# Supplementary material for: A terminal nickel(ii) anilide complex featuring an unsymmetrically substituted amido pincer ligand: synthesis and reactivity
Source: Royal Society of Chemistry journal article supplement (doi:10.1039/c1dt10191a), 2011-01-01
Supplement: c1dt10191a.pdf [file c1dt10191a.pdf]

Electronic supplementary information

**A Terminal Nickel(II) Anilide Complex Featuring an Unsymmetrically Substituted Amido Pincer Ligand: Synthesis and Reactivity**

Lan-Chang Liang,<sup>\*a</sup> Chun-Wei Li,<sup>a</sup> Pei-Ying Lee,<sup>a</sup> Chih-Hsiang Chang,<sup>a</sup> and Hon Man Lee<sup>b</sup>

<sup>a</sup>Department of Chemistry and Center for Nanoscience & Nanotechnology, National Sun Yat-sen University, Kaohsiung 80424, Taiwan; E-mail: lcliang@mail.nsysu.edu.tw

<sup>b</sup>Department of Chemistry, National Changhua University of Education, Changhua 50058, Taiwan

**Contents**

- **Table S1.** Structures and selected bond distances (Å) and angles (deg) of DFT geometry optimized [Ph-PNP-<sup>*i*</sup>Pr]NiEPh (E = NH, O, S, C≡C)
- **Table S2.** DFT computed energy, enthalpy, and Gibbs free energy changes of exchange reactions of [Ph-PNP-<sup>*i*</sup>Pr]NiNHPPh with PhEH (E = O, S, C≡C)
- **Figure S1.** Contour plot of HOMO of [Ph-PNP-<sup>*i*</sup>Pr]NiNHPPh
- **Table S3.** Optimized coordinates of [Ph-PNP-<sup>*i*</sup>Pr]NiNHPPh
- **Table S4.** Optimized coordinates of [Ph-PNP-<sup>*i*</sup>Pr]NiOPh
- **Table S5.** Optimized coordinates of [Ph-PNP-<sup>*i*</sup>Pr]NiSPh
- **Table S6.** Optimized coordinates of [Ph-PNP-<sup>*i*</sup>Pr]NiC≡CPh

**Table S1.** Structures and selected bond distances (Å) and angles (deg) of DFT geometry optimized [Ph-PNP-<sup>i</sup>Pr]NiEPh (E = NH, O, S, C≡C)

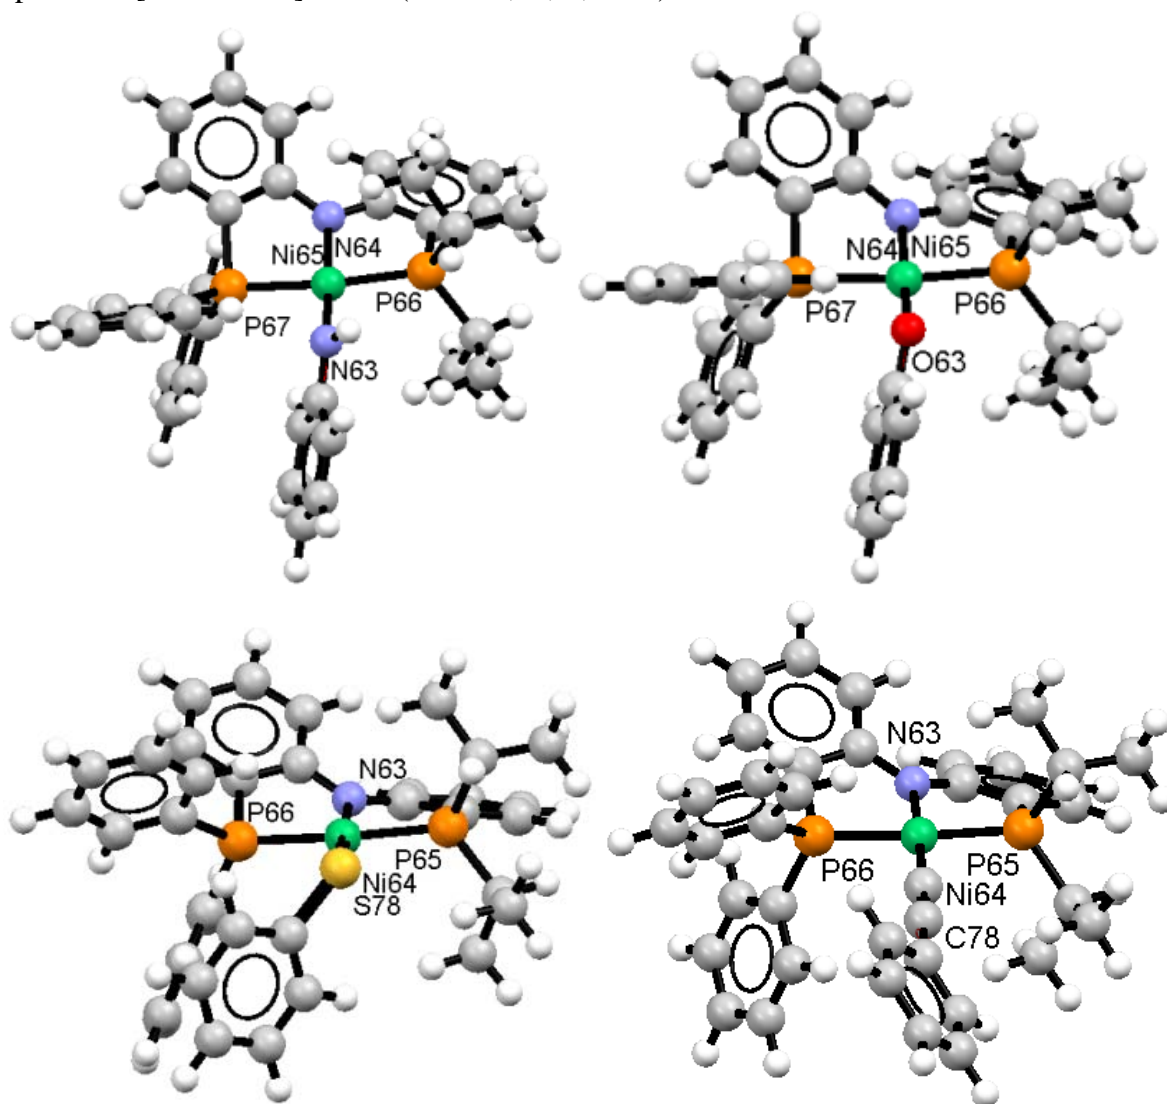

| E                                                    | NH     | O      | S      | C≡C    |
|------------------------------------------------------|--------|--------|--------|--------|
| Ni-X                                                 | 1.880  | 1.850  | 2.295  | 1.865  |
| N-Ni                                                 | 1.942  | 1.931  | 1.952  | 1.946  |
| Ph <sub>2</sub> P-Ni                                 | 2.362  | 2.326  | 2.313  | 2.253  |
| <sup>i</sup> Pr <sub>2</sub> P-Ni                    | 2.268  | 2.279  | 2.283  | 2.257  |
| ∠N-Ni-PPh <sub>2</sub>                               | 82.71  | 83.98  | 84.26  | 85.28  |
| ∠N-Ni-P <sup>i</sup> Pr <sub>2</sub>                 | 85.24  | 85.07  | 84.98  | 85.88  |
| ∠Ph <sub>2</sub> P-Ni-P <sup>i</sup> Pr <sub>2</sub> | 166.12 | 168.83 | 169.13 | 170.97 |
| ∠N-Ni-X                                              | 172.03 | 171.19 | 171.77 | 178.65 |
| ∠Ph <sub>2</sub> P-Ni-X                              | 98.00  | 97.81  | 99.30  | 93.41  |
| ∠ <sup>i</sup> Pr <sub>2</sub> P-Ni-X                | 94.88  | 93.34  | 91.56  | 95.42  |

X represents the donor atom in E.

**Table S2.** DFT computed energy, enthalpy, and Gibbs free energy changes of exchange reactions of [Ph-PNP-<sup>i</sup>Pr]NiNHPH with PhEH (E = O, S, C≡C)

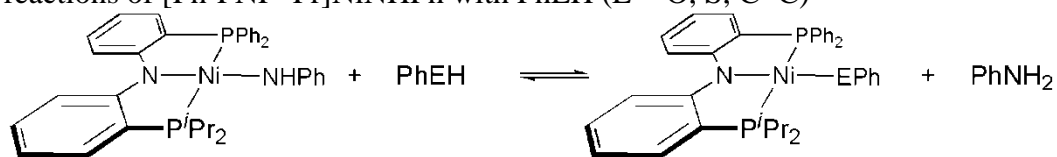

| E   | ΔE (kcal/mol) | ΔH (kcal/mol) | ΔG (kcal/mol) |
|-----|---------------|---------------|---------------|
| O   | -10.16        | -10.16        | -10.30        |
| S   | -17.94        | -17.94        | -18.19        |
| C≡C | -6.11         | -6.11         | -7.23         |

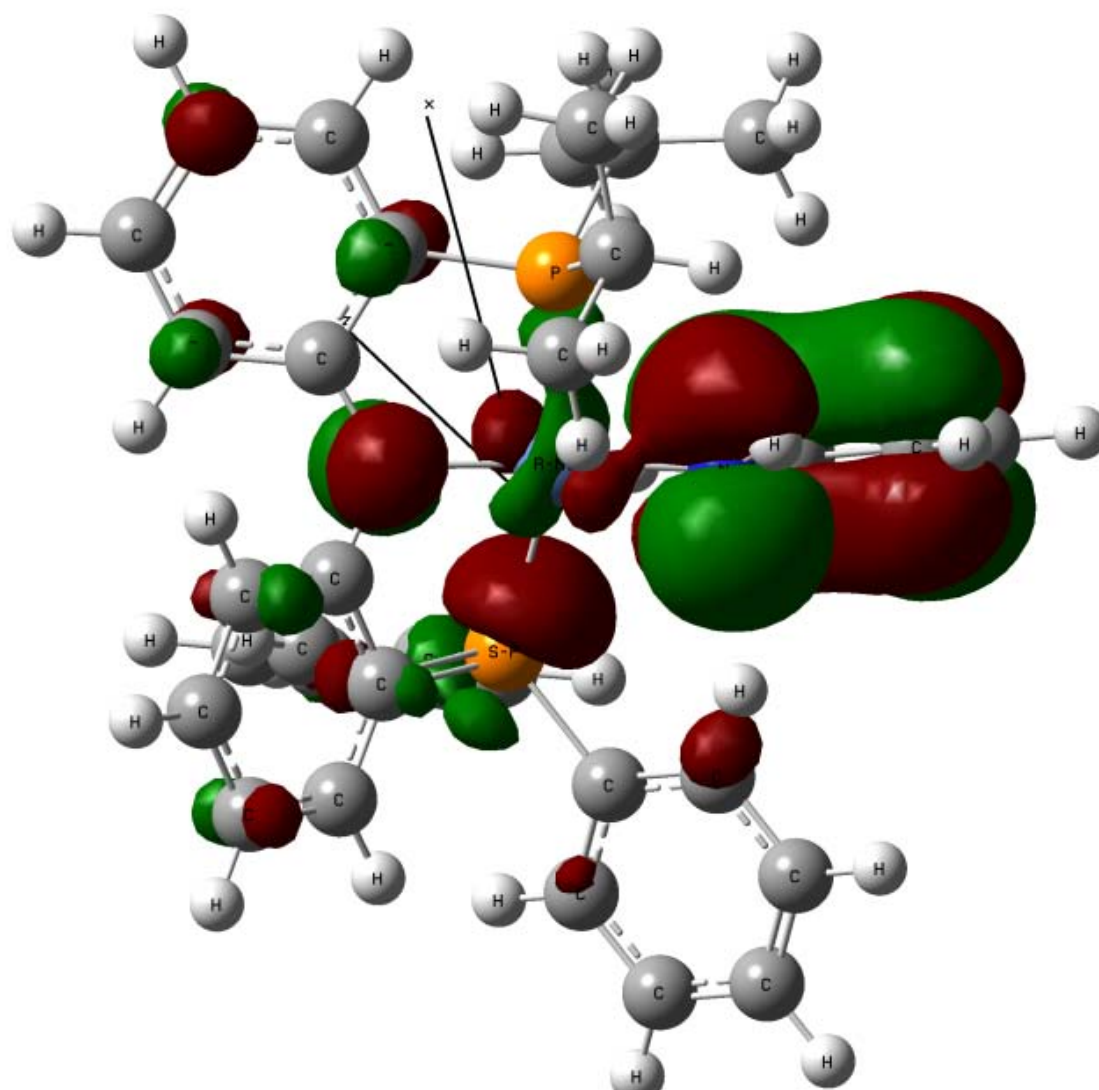

**Figure S1.** Contour plot of HOMO of [Ph-PNP-<sup>i</sup>Pr]NiHPh

**Table S3.** Optimized coordinates of [Ph-PNP-<sup>*i*</sup>Pr]NiNHPH

|   |             |             |             |
|---|-------------|-------------|-------------|
| C | 0.40660000  | -2.54680000 | -0.63470000 |
| C | -0.99740000 | -2.37360000 | -0.74970000 |
| C | -1.81220000 | -3.35410000 | -1.31430000 |
| H | -2.88110000 | -3.17900000 | -1.39590000 |
| C | -1.26280000 | -4.54400000 | -1.79230000 |
| H | -1.89620000 | -5.30460000 | -2.23740000 |
| C | 0.12070000  | -4.72450000 | -1.70570000 |
| H | 0.57260000  | -5.63250000 | -2.09720000 |
| C | 0.94420000  | -3.75270000 | -1.14530000 |
| H | 2.01610000  | -3.91140000 | -1.12200000 |
| C | 2.40620000  | -1.71750000 | 0.47800000  |
| C | 3.34600000  | -0.65190000 | 0.48520000  |
| C | 4.60010000  | -0.78990000 | 1.08590000  |
| H | 5.29450000  | 0.04610000  | 1.08510000  |
| C | 4.96690000  | -1.98430000 | 1.70480000  |
| H | 5.93970000  | -2.08740000 | 2.17460000  |
| C | 4.04440000  | -3.03570000 | 1.72580000  |
| H | 4.29820000  | -3.96570000 | 2.22830000  |
| C | 2.79260000  | -2.91280000 | 1.13370000  |
| H | 2.09110000  | -3.73680000 | 1.19380000  |
| C | -3.07470000 | -0.26320000 | -1.16540000 |
| C | -2.89810000 | 0.64510000  | -2.21690000 |
| H | -1.92580000 | 1.10750000  | -2.35520000 |
| C | -3.97640000 | 0.97660000  | -3.03970000 |
| H | -3.83590000 | 1.68730000  | -3.84920000 |
| C | -5.23190000 | 0.40930000  | -2.81740000 |
| H | -6.06940000 | 0.67090000  | -3.45810000 |
| C | -5.41360000 | -0.48770000 | -1.76240000 |
| H | -6.39090000 | -0.92570000 | -1.58000000 |
| C | -4.34020000 | -0.82250000 | -0.93600000 |
| H | -4.49050000 | -1.50820000 | -0.10770000 |
| C | -2.30190000 | -1.06810000 | 1.57820000  |
| C | -3.14570000 | -0.12730000 | 2.18630000  |
| H | -3.41850000 | 0.78130000  | 1.65830000  |
| C | -3.63620000 | -0.35300000 | 3.47270000  |
| H | -4.29450000 | 0.37910000  | 3.93190000  |
| C | -3.28130000 | -1.51140000 | 4.16770000  |
| H | -3.66110000 | -1.68360000 | 5.17070000  |
| C | -2.43620000 | -2.44590000 | 3.56810000  |
| H | -2.15720000 | -3.35060000 | 4.10110000  |
| C | -1.94880000 | -2.22820000 | 2.27760000  |
| H | -1.30250000 | -2.96510000 | 1.81170000  |
| C | 3.26880000  | 2.34120000  | 0.80370000  |
| H | 4.35020000  | 2.20640000  | 0.93000000  |
| C | 2.59240000  | 2.23550000  | 2.17660000  |
| H | 2.98910000  | 3.01200000  | 2.84050000  |
| H | 2.77570000  | 1.26480000  | 2.64600000  |
| H | 1.51190000  | 2.38490000  | 2.09340000  |

|    |             |             |             |
|----|-------------|-------------|-------------|
| C  | 3.00980000  | 3.70120000  | 0.14380000  |
| H  | 1.94140000  | 3.86630000  | -0.01860000 |
| H  | 3.52950000  | 3.80720000  | -0.81390000 |
| H  | 3.37290000  | 4.49790000  | 0.80260000  |
| C  | 3.60550000  | 1.10950000  | -1.98820000 |
| H  | 3.18810000  | 2.03900000  | -2.39520000 |
| C  | 3.22680000  | -0.05060000 | -2.91740000 |
| H  | 3.67070000  | 0.10480000  | -3.90720000 |
| H  | 2.14330000  | -0.13960000 | -3.03620000 |
| H  | 3.60020000  | -1.00250000 | -2.52670000 |
| C  | 5.12520000  | 1.25680000  | -1.85430000 |
| H  | 5.56800000  | 0.35810000  | -1.41380000 |
| H  | 5.41210000  | 2.11760000  | -1.24260000 |
| H  | 5.57140000  | 1.39450000  | -2.84610000 |
| N  | -0.08580000 | 2.00310000  | -0.93090000 |
| N  | 1.16080000  | -1.50320000 | -0.10050000 |
| Ni | 0.51710000  | 0.30590000  | -0.39290000 |
| P  | 2.70500000  | 0.89610000  | -0.30880000 |
| P  | -1.59220000 | -0.72310000 | -0.12640000 |
| H  | 0.42010000  | 2.40840000  | -1.71250000 |
| C  | -0.71140000 | 2.97480000  | -0.18800000 |
| C  | -0.91290000 | 4.28540000  | -0.69960000 |
| C  | -1.21180000 | 2.71560000  | 1.11350000  |
| C  | -1.59740000 | 5.25100000  | 0.02990000  |
| H  | -0.53630000 | 4.52380000  | -1.69310000 |
| C  | -1.89820000 | 3.69310000  | 1.83200000  |
| H  | -1.03030000 | 1.74260000  | 1.55860000  |
| C  | -2.10500000 | 4.96920000  | 1.30310000  |
| H  | -1.73650000 | 6.23930000  | -0.40250000 |
| H  | -2.26360000 | 3.45330000  | 2.82820000  |
| H  | -2.63510000 | 5.72800000  | 1.87020000  |

**Table S4.** Optimized coordinates of [Ph-PNP-<sup>i</sup>Pr]NiO<sub>2</sub>Ph

|   |             |             |             |
|---|-------------|-------------|-------------|
| C | 0.42164600  | -2.56616800 | -0.49998800 |
| C | -0.98196800 | -2.40602500 | -0.64339600 |
| C | -1.78646800 | -3.41463300 | -1.17295300 |
| H | -2.85468300 | -3.24653800 | -1.27671900 |
| C | -1.22718800 | -4.62220400 | -1.58956700 |
| H | -1.85144300 | -5.40520500 | -2.00775200 |
| C | 0.15656300  | -4.78997500 | -1.47903000 |
| H | 0.61774600  | -5.71161000 | -1.82518700 |
| C | 0.96954000  | -3.79122500 | -0.95258100 |
| H | 2.04124100  | -3.94540900 | -0.91004400 |
| C | 2.42867900  | -1.68356200 | 0.56477800  |
| C | 3.36625800  | -0.61956400 | 0.49625100  |
| C | 4.63740100  | -0.73448200 | 1.06411900  |
| H | 5.33322400  | 0.09801700  | 1.00118300  |
| C | 5.01957200  | -1.90010400 | 1.72791000  |
| H | 6.00645400  | -1.98495600 | 2.17137100  |
| C | 4.09595700  | -2.94501800 | 1.82911600  |
| H | 4.36153300  | -3.84988500 | 2.36980700  |
| C | 2.82705800  | -2.84536500 | 1.26807100  |
| H | 2.12381600  | -3.66114500 | 1.38959100  |
| C | -2.97785400 | -0.24926400 | -1.26308400 |
| C | -2.70078900 | 0.63868000  | -2.31106900 |
| H | -1.71241000 | 1.08103600  | -2.38811600 |
| C | -3.70851300 | 0.97983400  | -3.21557100 |
| H | -3.49184600 | 1.67344800  | -4.02291100 |
| C | -4.99040200 | 0.44584300  | -3.07686200 |
| H | -5.77209300 | 0.71638300  | -3.78111500 |
| C | -5.27171300 | -0.42723300 | -2.02357500 |
| H | -6.27087600 | -0.83703400 | -1.90583700 |
| C | -4.27019500 | -0.77318000 | -1.11598200 |
| H | -4.49789800 | -1.43938900 | -0.28927600 |
| C | -2.41065200 | -0.98797700 | 1.55376200  |
| C | -2.19650200 | -2.16319800 | 2.28267100  |
| H | -1.58620200 | -2.95592900 | 1.86209700  |
| C | -2.77487300 | -2.32019000 | 3.54427300  |
| H | -2.60517300 | -3.23675600 | 4.10219900  |
| C | -3.57016900 | -1.30832000 | 4.08308000  |
| H | -4.02049500 | -1.43272900 | 5.06377200  |
| C | -3.78352200 | -0.13337800 | 3.35819300  |
| H | -4.39977100 | 0.65955200  | 3.77226100  |
| C | -3.20338900 | 0.03130500  | 2.10037400  |
| H | -3.36159200 | 0.95407300  | 1.55103500  |
| C | 3.34961500  | 2.39908000  | 0.63625700  |
| H | 4.43992500  | 2.27493100  | 0.65724100  |
| C | 2.82284600  | 2.37969500  | 2.07669700  |
| H | 3.29033300  | 3.19038400  | 2.64720400  |
| H | 3.05086000  | 1.43708500  | 2.58249500  |
| H | 1.74035500  | 2.53540100  | 2.10001100  |

|    |             |             |             |
|----|-------------|-------------|-------------|
| C  | 3.01208000  | 3.71446100  | -0.07849800 |
| H  | 1.93178600  | 3.85338200  | -0.16990200 |
| H  | 3.45121300  | 3.76870400  | -1.07931400 |
| H  | 3.41292900  | 4.55334400  | 0.50159300  |
| C  | 3.45558000  | 1.00116700  | -2.08472200 |
| H  | 3.01309000  | 1.91315300  | -2.50181200 |
| C  | 2.99082100  | -0.19632000 | -2.92225600 |
| H  | 3.36602400  | -0.09986600 | -3.94739700 |
| H  | 1.90007200  | -0.26182600 | -2.96118600 |
| H  | 3.37143400  | -1.13746700 | -2.51226300 |
| C  | 4.98207800  | 1.13071300  | -2.06929300 |
| H  | 5.44665100  | 0.24707800  | -1.61991300 |
| H  | 5.32176700  | 2.01457700  | -1.52076100 |
| H  | 5.35657200  | 1.21700600  | -3.09594400 |
| O  | -0.08874600 | 1.94668800  | -0.86786800 |
| N  | 1.16508600  | -1.50070300 | 0.00452800  |
| Ni | 0.49293300  | 0.28389100  | -0.30133300 |
| P  | 2.68859100  | 0.89344000  | -0.33255700 |
| P  | -1.59078600 | -0.73285200 | -0.11318800 |
| C  | -0.70414900 | 2.85455100  | -0.11613200 |
| C  | -1.10969300 | 4.07161300  | -0.71723300 |
| C  | -0.97201700 | 2.68646000  | 1.26238700  |
| C  | -1.75213700 | 5.05708000  | 0.02544800  |
| H  | -0.90691200 | 4.21175900  | -1.77526600 |
| C  | -1.61675400 | 3.68577400  | 1.99539800  |
| H  | -0.66733000 | 1.76236800  | 1.74654800  |
| C  | -2.01351400 | 4.87802600  | 1.38901700  |
| H  | -2.05297300 | 5.97932600  | -0.46634100 |
| H  | -1.80651800 | 3.52457200  | 3.05425400  |
| H  | -2.51305600 | 5.65245000  | 1.96308400  |



**Table S5.** Optimized coordinates of [Ph-PNP-<sup>i</sup>Pr]NiSPh

|   |             |             |             |
|---|-------------|-------------|-------------|
| C | -0.89799900 | 2.53607700  | -0.23741500 |
| C | 0.51397200  | 2.55945700  | -0.35974800 |
| C | 1.20384700  | 3.71349600  | -0.73147500 |
| H | 2.28644800  | 3.68279700  | -0.81752500 |
| C | 0.51380700  | 4.89056300  | -1.01615200 |
| H | 1.04836500  | 5.78811800  | -1.31000600 |
| C | -0.88292700 | 4.87714600  | -0.94483400 |
| H | -1.44512800 | 5.77199300  | -1.20022700 |
| C | -1.57998800 | 3.73317000  | -0.57114600 |
| H | -2.66298500 | 3.75391900  | -0.55406200 |
| C | -2.79791700 | 1.32823900  | 0.67299100  |
| C | -3.60137100 | 0.17235800  | 0.49817500  |
| C | -4.89289300 | 0.09756800  | 1.02658600  |
| H | -5.48566300 | -0.80084300 | 0.87767200  |
| C | -5.42681200 | 1.15482500  | 1.76210900  |
| H | -6.42951500 | 1.09205800  | 2.17250500  |
| C | -4.62961000 | 2.28225500  | 1.98281200  |
| H | -5.00903400 | 3.10241100  | 2.58711400  |
| C | -3.34434600 | 2.37193900  | 1.46018500  |
| H | -2.74290300 | 3.24760900  | 1.67367900  |
| C | 2.70035200  | 0.83611500  | -1.33073400 |
| C | 2.41289900  | 0.33078200  | -2.60551700 |
| H | 1.43221600  | -0.08720400 | -2.80617400 |
| C | 3.39566800  | 0.33215100  | -3.59632100 |
| H | 3.16562100  | -0.06458400 | -4.58102800 |
| C | 4.67078900  | 0.83060800  | -3.32083200 |
| H | 5.43553400  | 0.82724500  | -4.09238800 |
| C | 4.96177800  | 1.32914000  | -2.05014300 |
| H | 5.95253500  | 1.71596900  | -1.82897900 |
| C | 3.98037700  | 1.33443900  | -1.05661300 |
| H | 4.21535900  | 1.71987600  | -0.06969000 |
| C | 2.15486500  | 1.01452100  | 1.59864800  |
| C | 1.76937300  | 1.99842600  | 2.51748200  |
| H | 1.02319100  | 2.73558800  | 2.23878200  |
| C | 2.35077600  | 2.03807400  | 3.78604600  |
| H | 2.04805500  | 2.80660800  | 4.49164600  |
| C | 3.31936800  | 1.09899600  | 4.14398200  |
| H | 3.77239700  | 1.13252200  | 5.13081500  |
| C | 3.70289300  | 0.11555000  | 3.22997100  |
| H | 4.45267600  | -0.62206300 | 3.50076100  |
| C | 3.12094100  | 0.06632400  | 1.96263400  |
| H | 3.42313400  | -0.70680500 | 1.26435300  |
| C | -3.20264900 | -2.77552600 | 0.62643100  |
| H | -4.29414300 | -2.72497200 | 0.72355700  |
| C | -2.58489600 | -2.69462300 | 2.02740100  |
| H | -2.90371100 | -3.55735100 | 2.62331700  |
| H | -2.89094600 | -1.78666400 | 2.55477900  |
| H | -1.49267100 | -2.70672100 | 1.96986700  |

|    |             |             |             |
|----|-------------|-------------|-------------|
| C  | -2.82650100 | -4.07407900 | -0.09628200 |
| H  | -1.74892300 | -4.12948200 | -0.27036200 |
| H  | -3.33270300 | -4.17336700 | -1.06148600 |
| H  | -3.12654200 | -4.92880200 | 0.52113200  |
| C  | -3.46880700 | -1.41799200 | -2.11872700 |
| H  | -2.93213000 | -2.28374200 | -2.52409500 |
| C  | -3.12593300 | -0.18650100 | -2.96576500 |
| H  | -3.48607200 | -0.32899100 | -3.99091000 |
| H  | -2.04696400 | -0.01360300 | -3.00284400 |
| H  | -3.60090900 | 0.71483400  | -2.56454500 |
| C  | -4.97416100 | -1.70544100 | -2.11173900 |
| H  | -5.53367700 | -0.86368200 | -1.69115200 |
| H  | -5.22788700 | -2.60532500 | -1.54306200 |
| H  | -5.32514300 | -1.85634900 | -3.13928700 |
| N  | -1.51490800 | 1.34298400  | 0.13063900  |
| Ni | -0.61701400 | -0.33608100 | -0.29787400 |
| P  | -2.72341100 | -1.21254100 | -0.36762800 |
| P  | 1.31789900  | 0.91039200  | -0.07372900 |
| C  | 1.79178500  | -2.74562800 | -0.14971300 |
| C  | 3.03500500  | -2.79932500 | -0.79762000 |
| C  | 1.71316100  | -3.14721600 | 1.19217500  |
| C  | 4.17021200  | -3.24730800 | -0.11768600 |
| H  | 3.10699800  | -2.49099400 | -1.83492600 |
| C  | 2.84956500  | -3.59015100 | 1.87019000  |
| H  | 0.75595400  | -3.12006200 | 1.70189100  |
| C  | 4.08432900  | -3.64379800 | 1.21888400  |
| H  | 5.12408700  | -3.28531100 | -0.63729700 |
| H  | 2.76694000  | -3.89855600 | 2.90910600  |
| H  | 4.96744700  | -3.99592100 | 1.74456200  |
| S  | 0.28940100  | -2.28789700 | -1.09428500 |

**Table S6.** Optimized coordinates of [Ph-PNP-<sup>i</sup>Pr]NiC≡CPh

|   |             |             |             |
|---|-------------|-------------|-------------|
| C | 2.16281600  | -1.96583200 | -0.66283800 |
| C | 0.95013200  | -2.70649800 | -0.62134700 |
| C | 0.86318100  | -4.01338800 | -1.10156700 |
| H | -0.09171500 | -4.53173900 | -1.06946500 |
| C | 1.98147600  | -4.64297900 | -1.64741500 |
| H | 1.91643100  | -5.65864400 | -2.02404400 |
| C | 3.17602700  | -3.92108000 | -1.73006000 |
| H | 4.04999000  | -4.37616300 | -2.18951800 |
| C | 3.27206000  | -2.61534600 | -1.25888700 |
| H | 4.20449800  | -2.07713600 | -1.37861200 |
| C | 3.31796500  | -0.01299200 | 0.22999600  |
| C | 3.34273700  | 1.40893100  | 0.25502100  |
| C | 4.46898000  | 2.11090800  | 0.69033600  |
| H | 4.45492600  | 3.19749600  | 0.70046500  |
| C | 5.60499800  | 1.43636300  | 1.13724100  |
| H | 6.47634100  | 1.98558300  | 1.47909700  |
| C | 5.57945000  | 0.03917900  | 1.16423400  |
| H | 6.43630400  | -0.50935800 | 1.54745800  |
| C | 4.46750900  | -0.67421300 | 0.72928600  |
| H | 4.47207000  | -1.75491800 | 0.80124800  |
| C | -1.96715600 | -2.20084500 | -1.00947000 |
| C | -2.23488900 | -1.49091300 | -2.18671300 |
| H | -1.61225300 | -0.64369600 | -2.45541000 |
| C | -3.31049200 | -1.85914200 | -2.99554000 |
| H | -3.51262900 | -1.30470700 | -3.90755200 |
| C | -4.12997800 | -2.92944900 | -2.62879600 |
| H | -4.97037600 | -3.21122300 | -3.25676400 |
| C | -3.87225600 | -3.63104300 | -1.45031700 |
| H | -4.51095500 | -4.45943900 | -1.15736300 |
| C | -2.79367400 | -3.26864300 | -0.64049000 |
| H | -2.60237100 | -3.81091900 | 0.28055600  |
| C | -0.87941500 | -2.26830400 | 1.74951500  |
| C | -0.34013400 | -3.43575900 | 2.30047000  |
| H | 0.33506400  | -4.05047700 | 1.71323200  |
| C | -0.66531300 | -3.80351800 | 3.60857100  |
| H | -0.24387400 | -4.71043200 | 4.03290400  |
| C | -1.52534500 | -3.00840000 | 4.36718200  |
| H | -1.77573600 | -3.29571700 | 5.38447700  |
| C | -2.05767600 | -1.83803400 | 3.81990000  |
| H | -2.72023200 | -1.21195000 | 4.41065400  |
| C | -1.73433600 | -1.46306700 | 2.51606100  |
| H | -2.13043000 | -0.54373200 | 2.09346100  |
| C | 1.43206300  | 3.61247000  | 0.99768300  |
| H | 2.37157300  | 4.17737100  | 1.04006800  |
| C | 1.14103300  | 3.02251100  | 2.38354400  |
| H | 1.03530000  | 3.83142500  | 3.11559300  |
| H | 1.94636900  | 2.36398900  | 2.72214300  |
| H | 0.20933500  | 2.44931000  | 2.36732400  |

|    |             |             |             |
|----|-------------|-------------|-------------|
| C  | 0.30633100  | 4.54124900  | 0.52541600  |
| H  | -0.62484800 | 3.98503800  | 0.38817000  |
| H  | 0.54789800  | 5.04566800  | -0.41509900 |
| H  | 0.13657000  | 5.31829600  | 1.27964700  |
| C  | 1.95471300  | 2.98529500  | -1.96290600 |
| H  | 0.97929100  | 3.44316300  | -2.16333600 |
| C  | 2.20514500  | 1.88590600  | -3.00217100 |
| H  | 2.26401700  | 2.32739400  | -4.00351500 |
| H  | 1.40393300  | 1.14199700  | -3.00066000 |
| H  | 3.14892600  | 1.36644700  | -2.80699400 |
| C  | 3.04449400  | 4.06251400  | -2.00015200 |
| H  | 4.02745400  | 3.63469300  | -1.77888700 |
| H  | 2.85700400  | 4.87570500  | -1.29196300 |
| H  | 3.09310100  | 4.50391800  | -3.00250400 |
| N  | 2.15661600  | -0.65094500 | -0.20087000 |
| Ni | 0.47111400  | 0.31959000  | -0.14401600 |
| P  | 1.73206900  | 2.18974800  | -0.23671500 |
| P  | -0.48203500 | -1.71648600 | 0.00985000  |
| C  | -3.55729300 | 2.36636900  | 0.02083300  |
| C  | -4.58505300 | 1.95209200  | -0.85304600 |
| C  | -3.84022900 | 3.40184300  | 0.93660300  |
| C  | -5.83931500 | 2.55601700  | -0.81425600 |
| H  | -4.38227300 | 1.14969000  | -1.55540500 |
| C  | -5.09812300 | 3.99914500  | 0.97213100  |
| H  | -3.06074700 | 3.72719600  | 1.61876000  |
| C  | -6.10365100 | 3.58216600  | 0.09661900  |
| H  | -6.61626800 | 2.22268400  | -1.49715800 |
| H  | -5.29434000 | 4.79495100  | 1.68579100  |
| H  | -7.08331000 | 4.05059800  | 0.12492200  |
| C  | -1.16416100 | 1.21293000  | -0.07572600 |
| C  | -2.26796200 | 1.75135700  | -0.02398400 |
